# Supplementary material
Source: publisher site journal article supplement (https://www.spandidos-publications.com/1812/downloadSupplementary)

Figure S1. Confirmation of transfection efficiency. H9c2 cells were transfected with si-NC, si-NEAT1, pcDNA-NC, pcDNA-NEAT1, NC, miR-590-5p, anti-NC or anti-miR-590-5p for 48 h. The expression levels of (A) NEAT1 and (B) miR-590-3p were determined using reverse transcription-quantitative PCR. \* $P < 0.05$ . NEAT1, nuclear enriched abundant transcript 1; miR, microRNA; si-NEAT1, small interfering RNA targeting NEAT1; NC, negative control; lncRNA, long non-coding RNA.

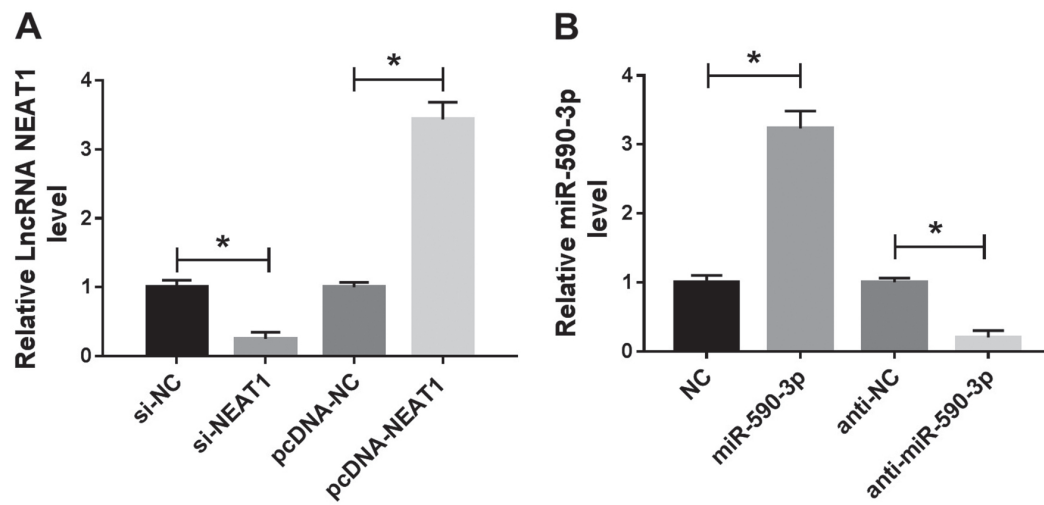

Figure S2. miR-590-5p suppresses TRAF6 expression in LPS-induced H9c2 cells. H9c2 cells were transfected with NC or miR-590-5p for 24 h, followed by stimulation with LPS ( $10\text{ }\mu\text{g/ml}$ ) for 12 h. TRAF6 protein levels were measured and quantified by western blot analysis. \* $P<0.05$ . LPS, lipopolysaccharide; miR, microRNA; NC, negative control; TRAF6, TNF receptor associated factor 6.

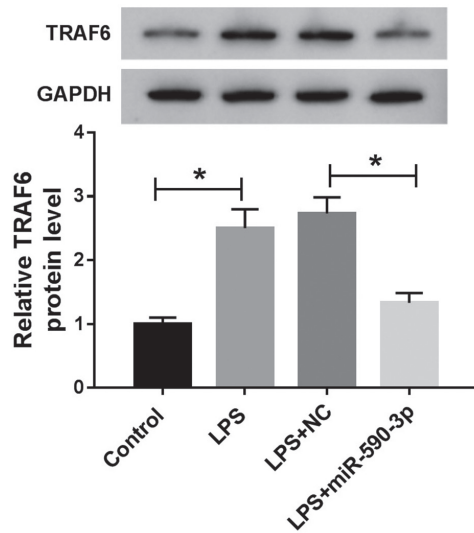

Supplement: Supplementary file 1 [file downloadSupplementary]
